# Supplementary material for: Near-infrared responsive magnetic photocatalyst based on NaYF4:Yb3+/Er3+@Cu2O@MoS2@Fe3O4 for the efficient degradation of organic contaminants
Source: Royal Society of Chemistry journal article supplement (doi:10.1039/d4nj00415a), 2024-01-01
Supplement: d4nj00415a1.pdf [file d4nj00415a1.pdf]

## Supporting Information

### Near-infrared responsive magnetic photocatalyst based on $\text{NaYF}_4:\text{Yb}^{3+}/\text{Er}^{3+}@\text{Cu}_2\text{O}@\text{MoS}_2@\text{Fe}_3\text{O}_4$ for efficient degradation of organic contaminants

Yuangong Ma,<sup>‡a</sup> Wensheng Zhang,<sup>‡a</sup> Zhifang Wu,<sup>a</sup> Zhishan Liang,<sup>a</sup> Youlin Huang,<sup>a</sup>  
Qingmei Tan,<sup>b</sup> Tianren Liu,<sup>b</sup> Dongxue Han<sup>a, b\*</sup> and Li Niu<sup>a, c\*</sup>

<sup>a</sup>School of Civil Engineering c/o Center for Advanced Analytical Science, Guangzhou University, Guangzhou 510006, P. R. China

<sup>b</sup>School of Chemistry and Chemical Engineering Guangzhou Key Laboratory of Sensing Materials & Devices, Center for Advanced Analytical Science, Guangzhou University, Guangzhou 510006, P. R. China

<sup>c</sup>School of Chemical Engineering and Technology, Sun Yat-sen University, Zhuhai 519082, P. R. China

\*E-mail: dxhan@gzhu.edu.cn, lniu@gzhu.edu.cn

‡These authors contributed equally to this work.

**Supporting Figures:**

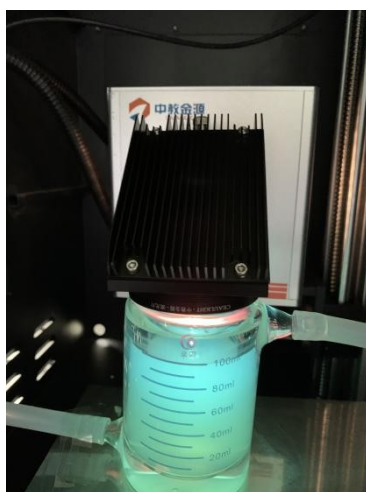

**Fig. S1** Schematic diagram of photocatalytic reaction system.

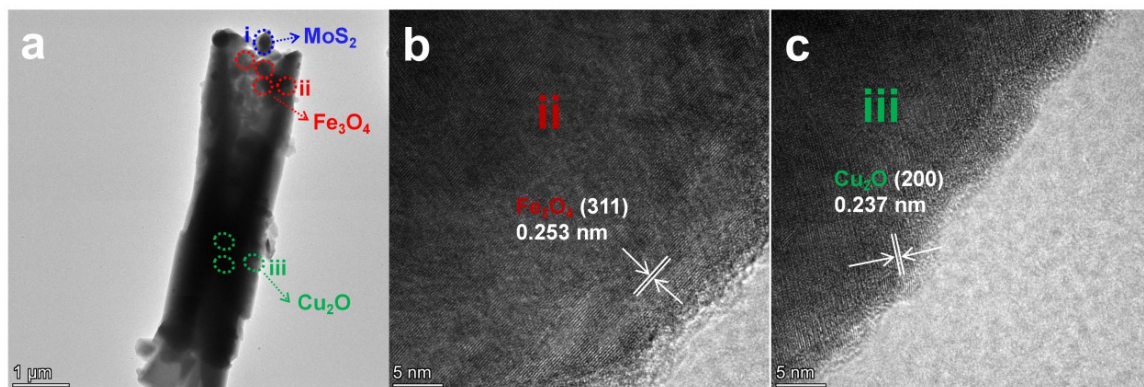

**Fig. S2** TEM (a), HR-TEM (b, c) images of the NYE@Cu<sub>2</sub>O@MoS<sub>2</sub>@Fe<sub>3</sub>O<sub>4</sub>.

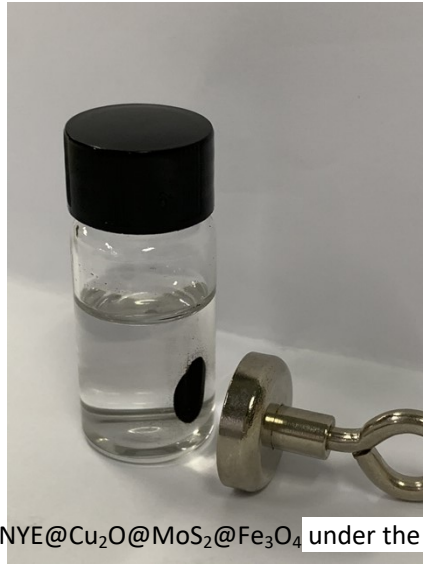

**Fig. S3** The photos of NYE@Cu<sub>2</sub>O@MoS<sub>2</sub>@Fe<sub>3</sub>O<sub>4</sub> under the applied magnetic field.

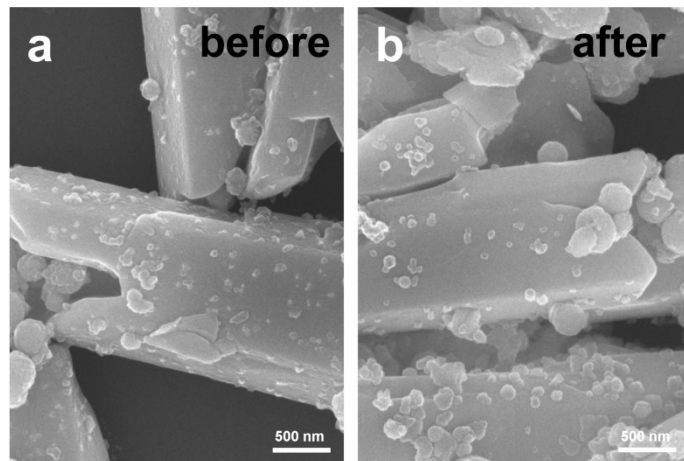

**Fig. S4** SEM images of NYE@Cu<sub>2</sub>O@MoS<sub>2</sub>@Fe<sub>3</sub>O<sub>4</sub> (a) before and (b) after cycle experiments of photodegradation of RhB under NIR light radiation.

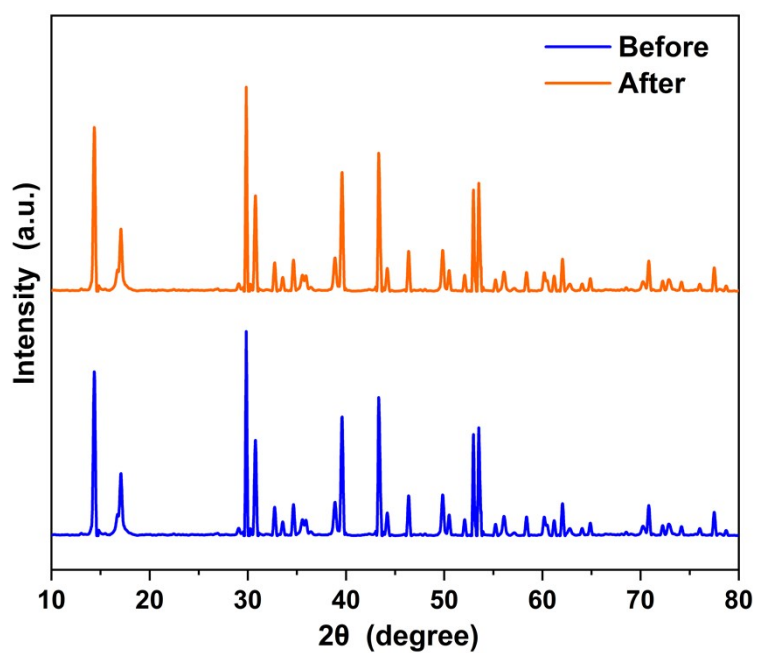

**Fig. S5** XRD patterns of NYE@Cu<sub>2</sub>O@MoS<sub>2</sub>@Fe<sub>3</sub>O<sub>4</sub> before and after cycle experiments of photodegradation of RhB under NIR light radiation.

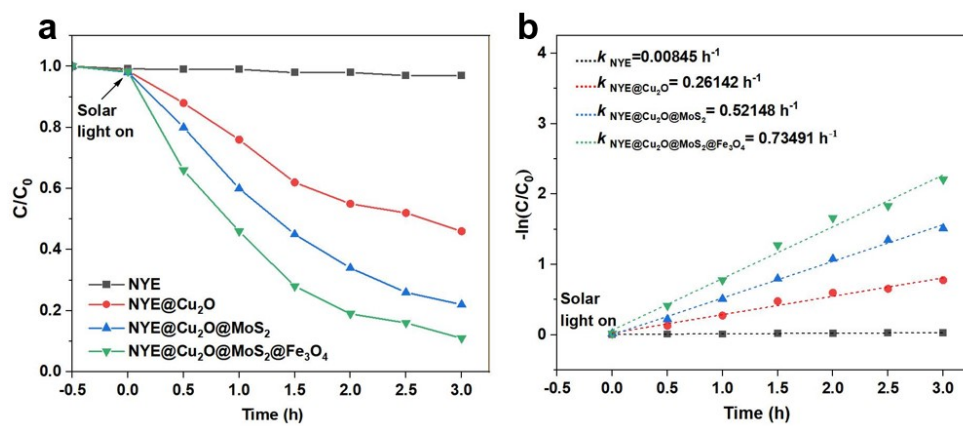

**Fig. S6** Photodegradation of RhB (a) and the corresponding degradation rate constant (b) over different photocatalysts under simulated solar light.

## Supporting Tables:

Table S1 The elements analysis of NYE@Cu<sub>2</sub>O@MoS<sub>2</sub>@Fe<sub>3</sub>O<sub>4</sub> by the EDS analysis.

| Element | Atomic fraction (%) | Mass fraction (%) |
|---------|---------------------|-------------------|
| O       | 3.22                | 1.06              |
| F       | 33.9                | 13.3              |
| Na      | 7.38                | 3.5               |
| S       | 0.549               | 0.363             |
| Fe      | 2.83                | 3.26              |
| Cu      | 37.7                | 49.4              |
| Y       | 12.9                | 23.7              |
| Mo      | 0.0502              | 0.0995            |
| Er      | 0.316               | 1.09              |
| Yb      | 1.19                | 4.27              |

Table S2 Corresponding normalized photocatalytic degradation rates of bare RhB and in the presence of the samples under simulated solar and NIR irradiation.

| Light                                                                  | Solar / h | NIR / h |
|------------------------------------------------------------------------|-----------|---------|
| NYE                                                                    | 0.00845   | 0.00239 |
| NYE@Cu <sub>2</sub> O                                                  | 0.26142   | 0.03821 |
| NYE@Cu <sub>2</sub> O@MoS <sub>2</sub>                                 | 0.52148   | 0.09983 |
| NYE@Cu <sub>2</sub> O@MoS <sub>2</sub> @Fe <sub>3</sub> O <sub>4</sub> | 1.03445   | 0.12834 |
